# Supplementary material for: Maintaining protein stability of ∆Np63 via USP28 is required by squamous cancer cells
Source: PubMed Central journal article supplement (PMC7136964; doi:10.15252/emmm.201911101), 2020-03-04

Fig.3A

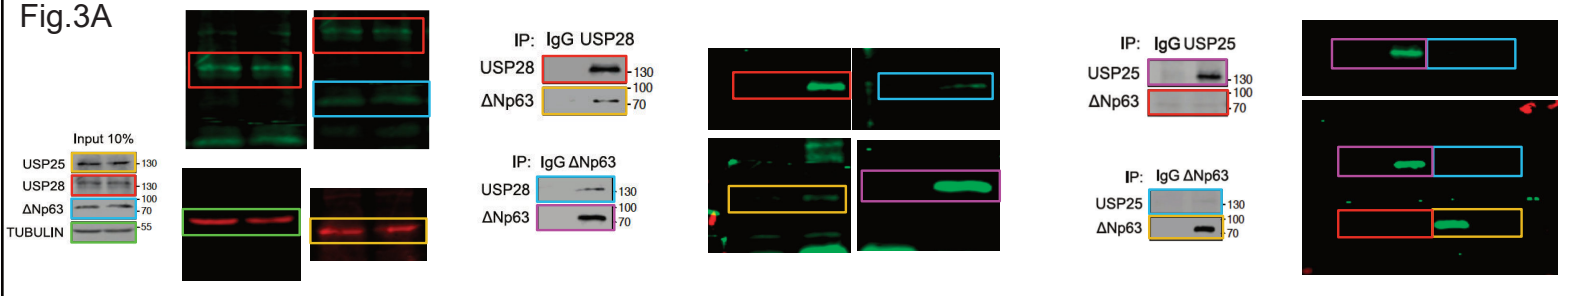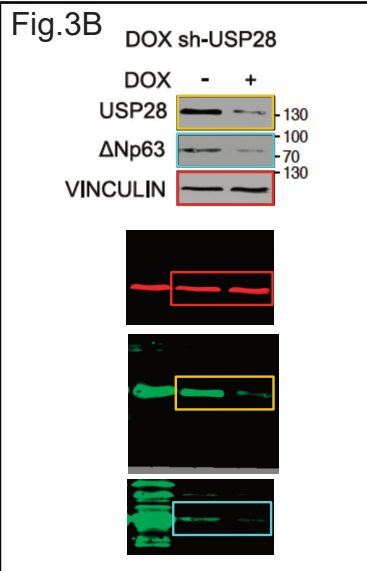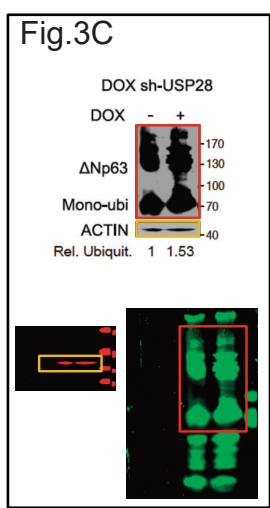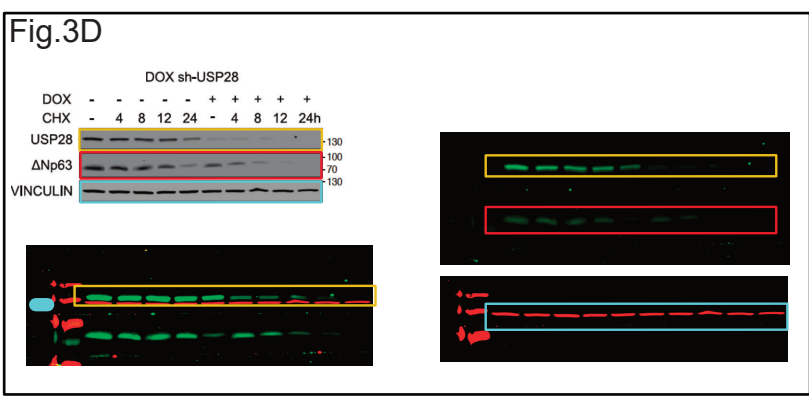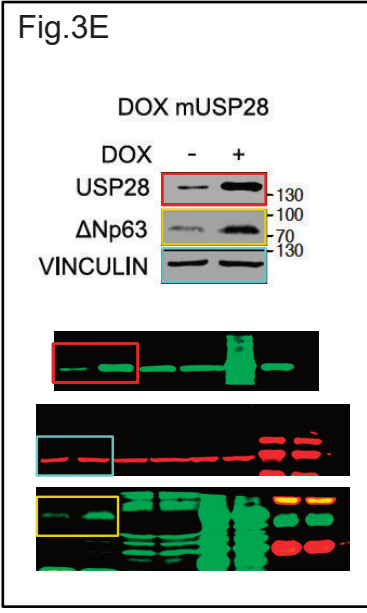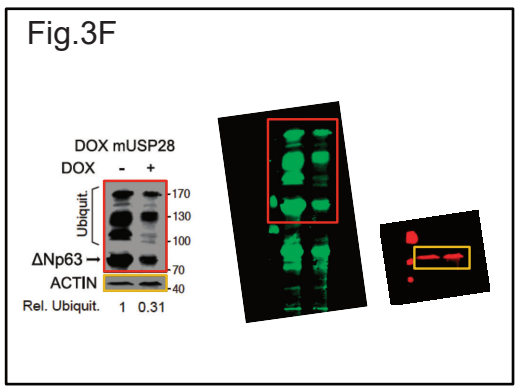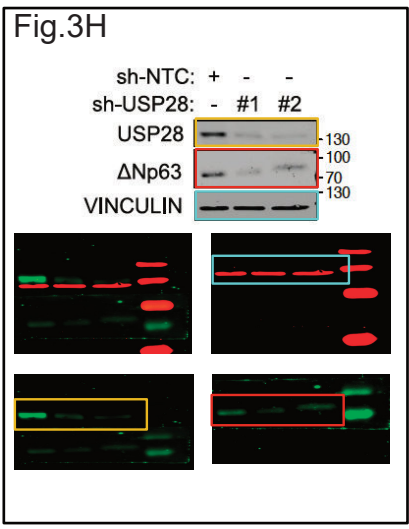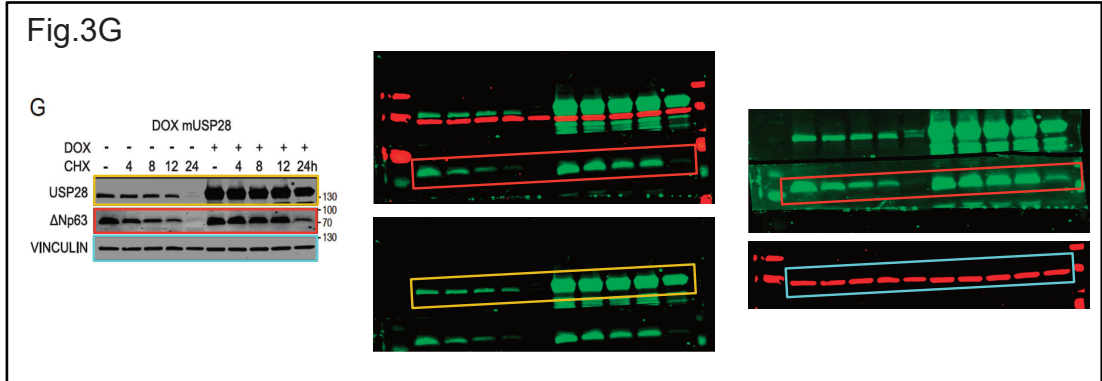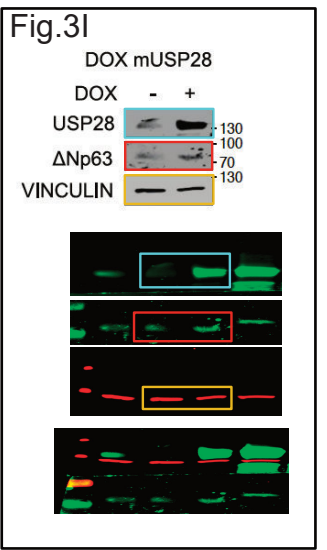

Supplement: EMMM-12-e11101-s003.pdf [file EMMM-12-e11101-s003.pdf]
