# Supplementary material for: Maintaining protein stability of ∆Np63 via USP28 is required by squamous cancer cells
Source: PubMed Central journal article supplement (PMC7136964; doi:10.15252/emmm.201911101), 2020-03-04

ACTIN line2  
FIG6E  
NSCLC

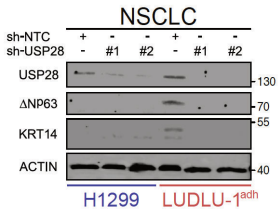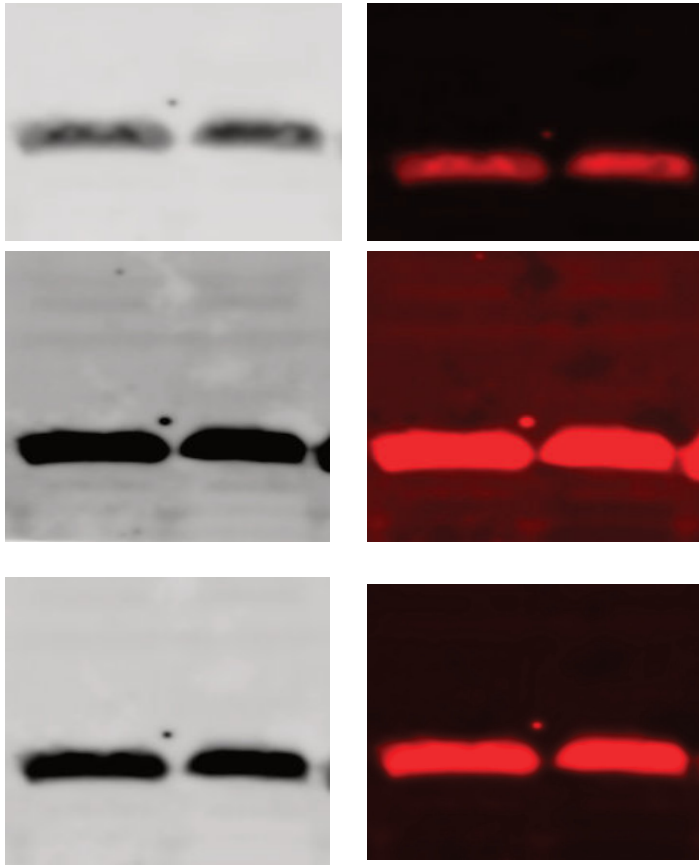

ACTIN line2  
FIG6E  
CERVIX

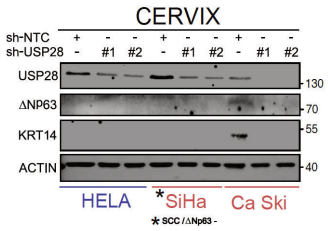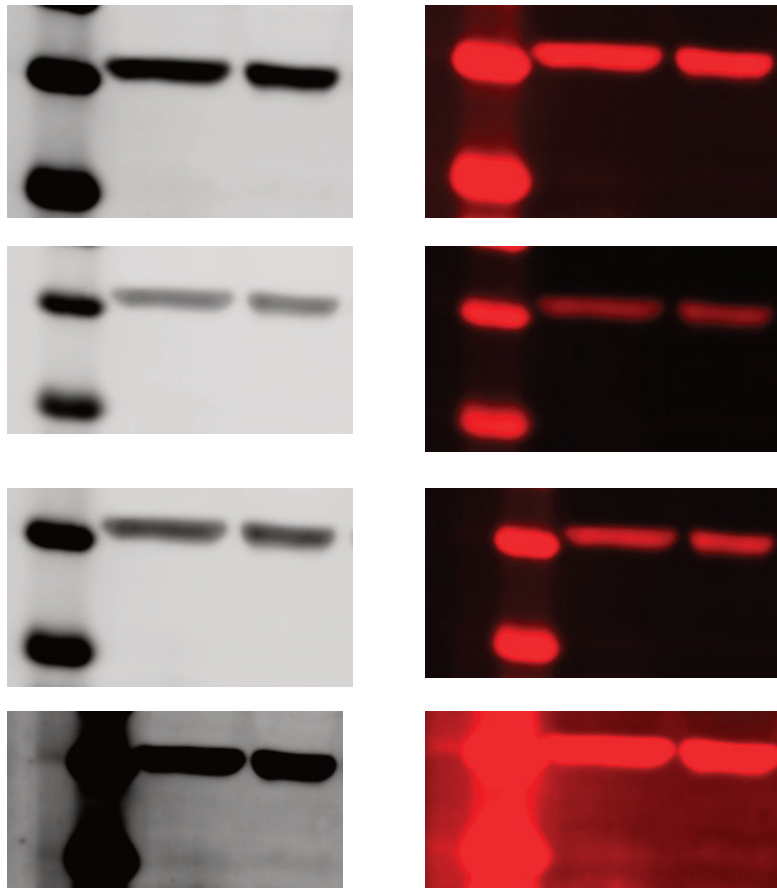

Supplement: EMMM-12-e11101-s004.pdf [file EMMM-12-e11101-s004.pdf]
